# Supplementary material for: Catalytic formation of luminescent lanthanide complexes using an entropy-driven DNA circuit
Source: Royal Society of Chemistry journal article supplement (doi:10.1039/d0cc00602e), 2020-01-01
Supplement: d0cc00602e1.pdf [file d0cc00602e1.pdf]

## Electronic Supplementary Information

### Catalytic formation of luminescent lanthanide complexes using entropy-driven DNA circuit

Yusuke Kitamura,\* Yukina Azuma, Yousuke Katsuda, and Toshihiro Ihara\*

*Division of Materials Science and Chemistry, Faculty of Advanced Science and Technology, Kumamoto University, 2-39-1 Kurokami, Chuo-ku, Kumamoto 860-8555, Japan*

**Oligonucleotides.** ODNs were synthesized by a conventional phosphoramidite method on a universal CPG (controlled pore glass) column (Glen Research). Cleavage from the CPG support and deprotection was carried out by incubation in aqueous ammonia (28 %) for 8 h at 80 °C. The aqueous ammonia was evaporated under reduced pressure. From these crude mixtures, the resulting ODNs were purified with a conventional two-step procedure using RP-HPLC (linear gradient: 0.1 M triethylammonium acetate (TEAA), pH 7.0/acetonitrile) and identified with MALDI-TOF/MS. For the synthesis of **Phen-DNA** and **EDTA-DNA**, 5'- and 3'-aminohexyl-linked DNAs were purified.

**Synthesis of EDTA-DNA.** The purified 3'-aminohexyl-linked DNA (20 nmol) was dissolved in 20  $\mu$ L of 0.5 M carbonate-Na buffer (pH 9.37). To this solution, was added phen active ester (2  $\mu$ mol) dissolved in 40  $\mu$ L DMSO. The resulting solution was stirred at ambient temperature for 24 h. After dilution to 300  $\mu$ L with 0.5 M EDTA solution (pH 8.0), the mixture was purified by RP-HPLC under the following conditions: column: InertSustain C18, GL Sciences; room temperature; flow rate: 1.0 mL min<sup>-1</sup>; eluent A: 0.1 M TEAA (pH 7.0); eluent B: acetonitrile; linear gradient, 0–20 % B in 30 min. MALDI-TOF/MS: calcd for [**EDTA-DNA** – H]<sup>-</sup>: m/z = 16182.59, found: 161680.80.

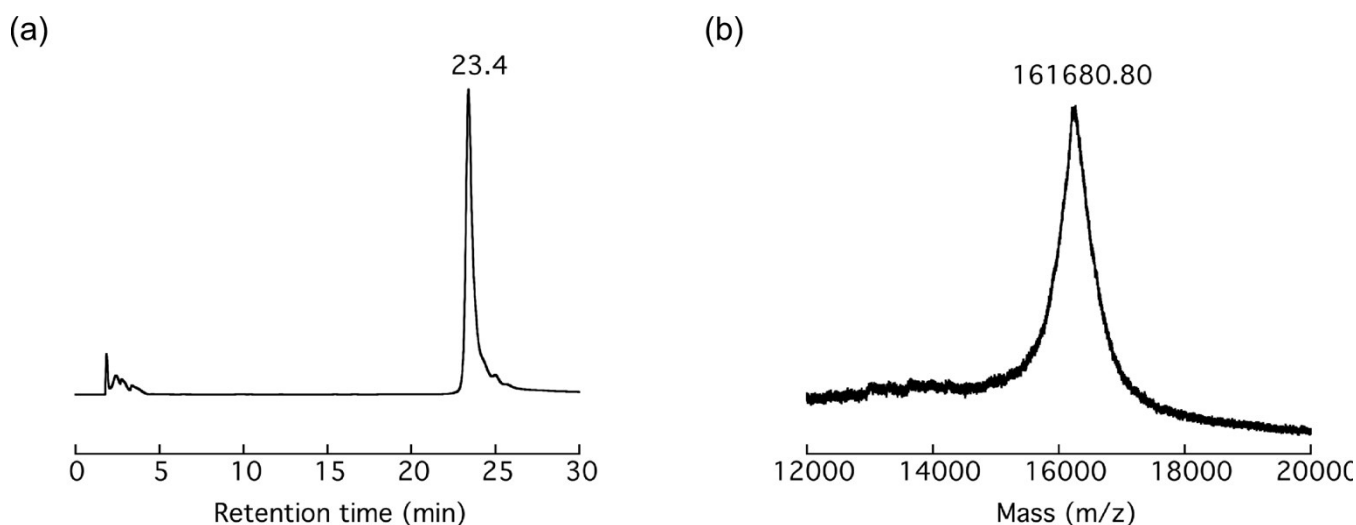

**Fig. S1.** (a) RP-HPLC chromatogram of the reaction mixture containing **EDTA-DNA**. Column: InertSustain C18 (4.6 mm ( $\Phi$ ) x 150 mm (w), GL Sciences); eluent A: 0.1 mM TEAA buffer (pH = 7.0); eluent B: acetonitrile; linear gradient: 0-20 % B in 30 min; flow rate: 1.0 mL/min. (b) MALDI-TOF MS spectrum of the fraction at 23.4 min in Fig. S1a.

**Synthesis of Phen-DNA.** The purified 5'-aminohexyl-linked DNA (20 nmol) was dissolved in 30  $\mu$ L of 0.5 M carbonate-Na buffer (pH 9.37). To this solution, was added phen active ester (2  $\mu$ mol) dissolved in 60  $\mu$ L DMSO. The resulting solution was stirred at 60 °C for 24 h. The mixture was subjected to GPC (NAP10 Column, Sephadex G-25, GE Healthcare Life Sciences) to remove excess hydrolyzed ester. After lyophilization, the residue was redissolved in 300  $\mu$ L of 0.5 M EDTA solution (pH 8.0), and then purified by RP-HPLC under the following conditions: column: InertSustain C18, GL Sciences; room temperature; flow rate: 1.0 mL min<sup>-1</sup>; eluent A: 0.1 M TEAA (pH 7.0); eluent B: acetonitrile; linear gradient, 0–20 % B in 30 min. MALDI-TOF/MS: calcd for [**Phen-DNA** – H]<sup>-</sup>: m/z = 13635.98, found: 13636.26.

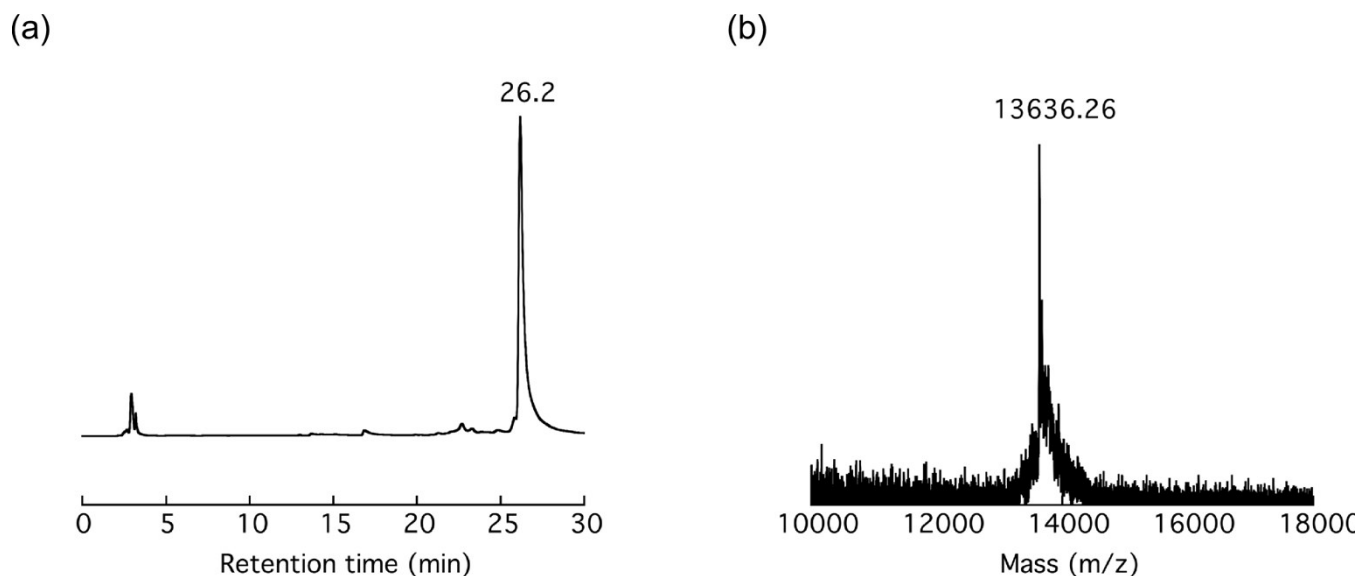

**Fig. S2.** (a) RP-HPLC chromatogram of the reaction mixture containing **EDTA-DNA**. Column: InertSustain C18 (4.6 mm ( $\Phi$ ) x 150 mm (w), GL Sciences); eluent A: 0.1 mM TEAA buffer (pH = 7.0); eluent B: acetonitrile; linear gradient: 0-20 % B in 30 min; flow rate: 1.0 mL/min. (b) MALDI-TOF MS spectrum of the fraction at 26.2 min in Fig. S2a.

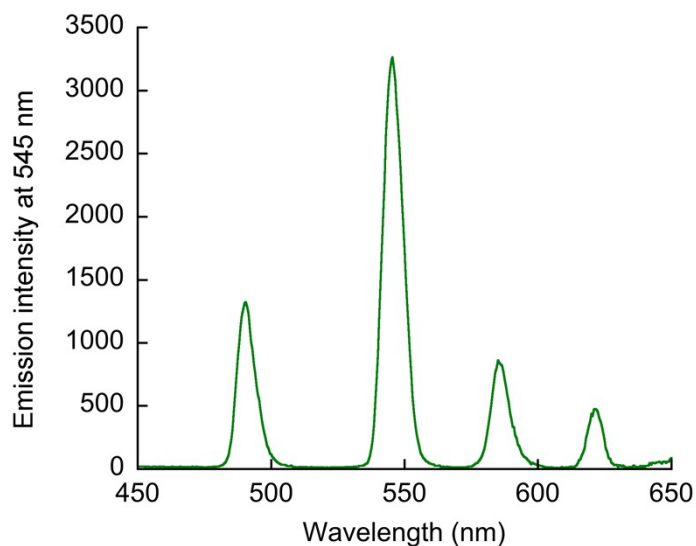

**Fig. S3.** Time-resolved emission spectra of the solutions containing **EDTA-DNA/Phen-DNA** in the presence of Tb(III) at 10 °C. Concentrations of **EDTA-DNA**, **Phen-DNA**, and Tb(III) were 1.0  $\mu$ M, 1.0  $\mu$ M, and 1.2  $\mu$ M, respectively. Excitation wavelength was 280 nm. Measurement was carried out in 10 mM HEPES buffer (pH 7.2) containing 200 mM NaCl after equilibration at 10 °C for 30 min. Delay time: 50  $\mu$ s. Gate time: 2 ms.

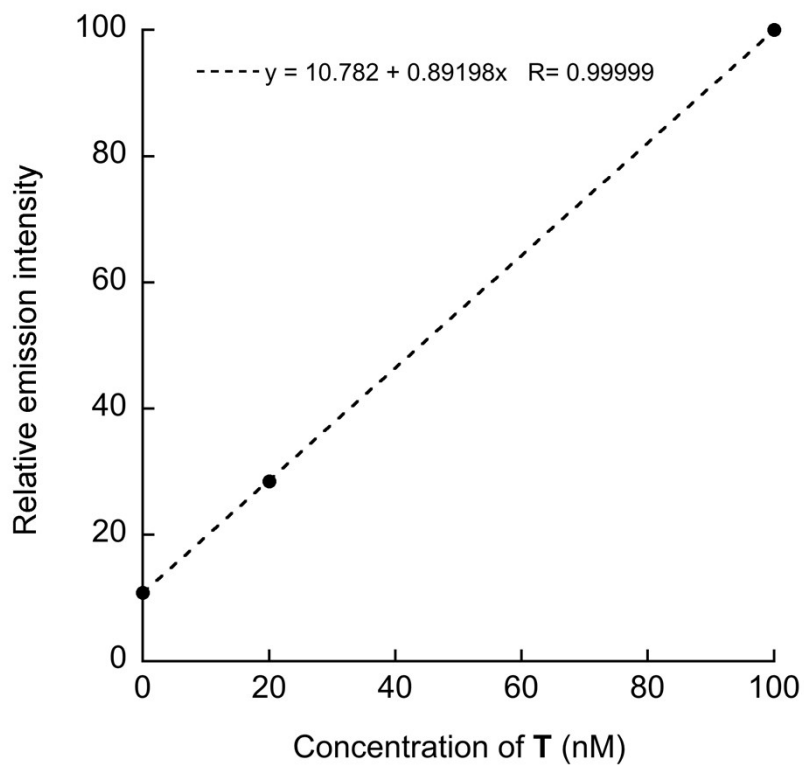

**Fig. S4.** Calibration curve for the emission intensities at 1 h as a function of the concentration of **T**. Detection limits was calculated to be 12 nM by defining as the concentration of **T** which gave two times larger emission intensity than that without **T**.
